# Supplementary material
Source: publisher figshare collection journal article supplement (https://tandf.figshare.com/articles/dataset/_/3979131)

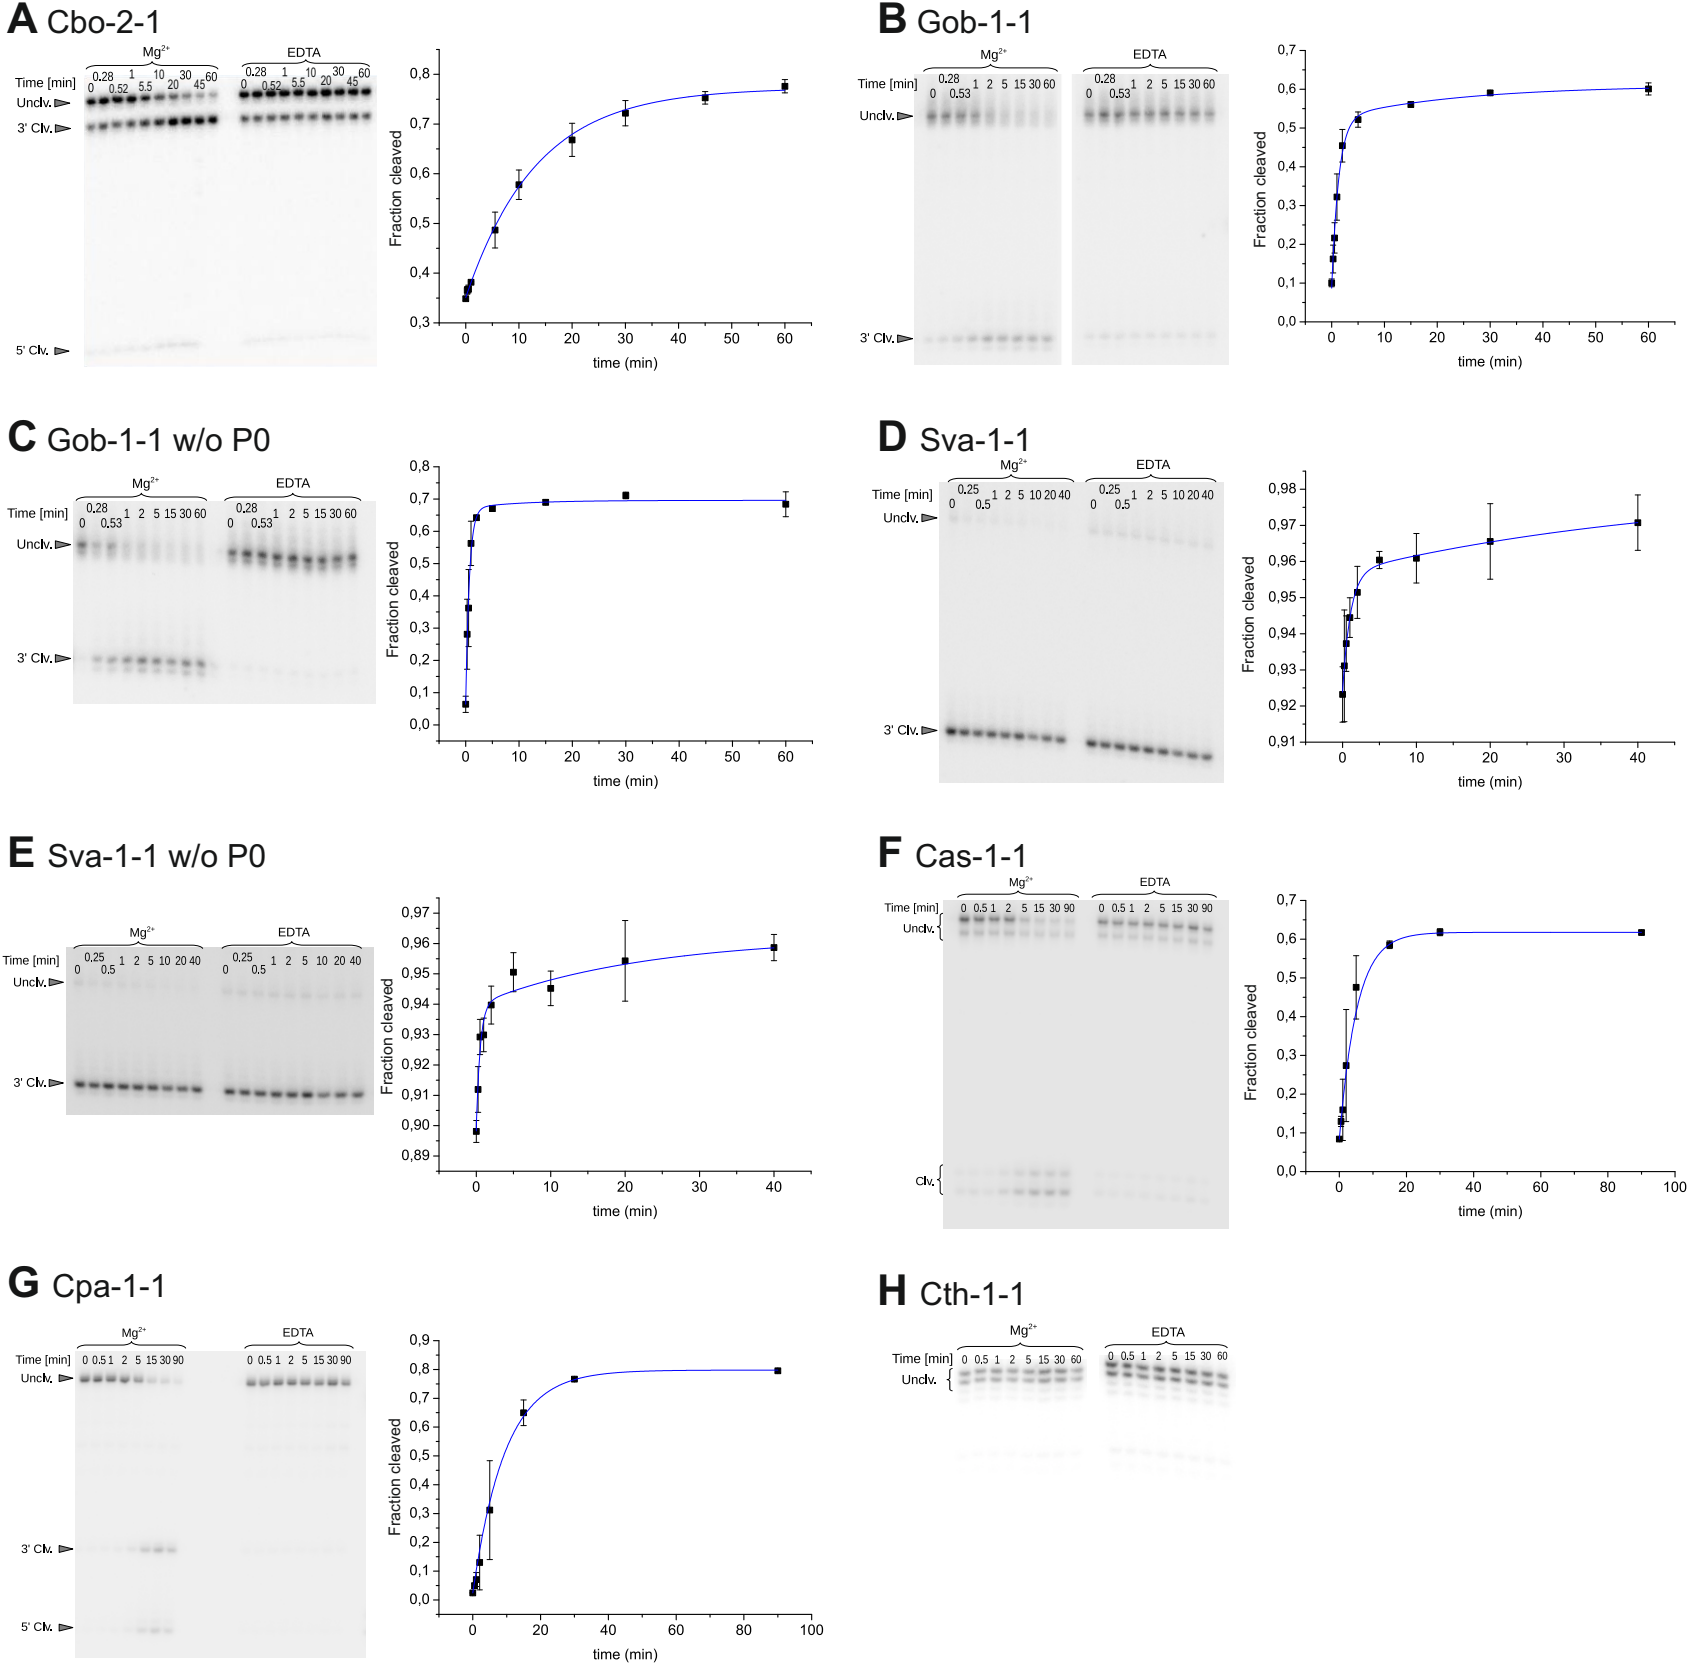

Supplement: Supplementary file 1 [file 1]

## A Gob-1-1

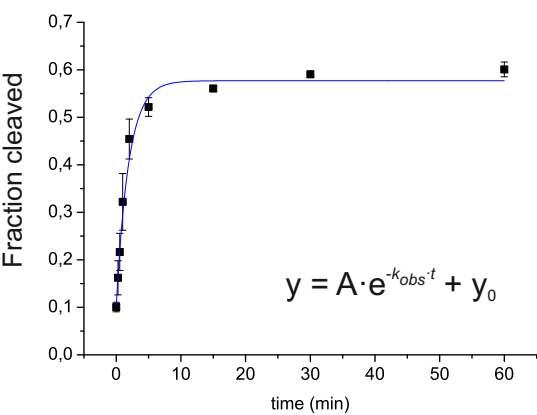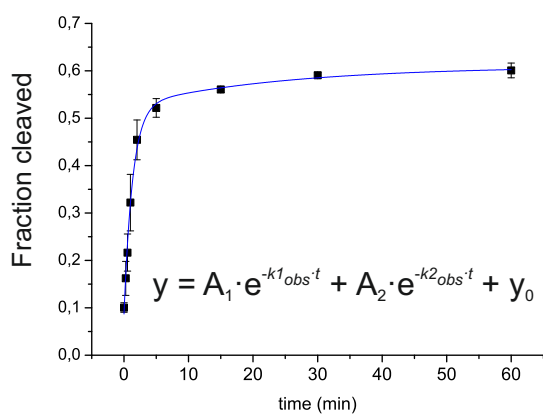

## B Gob-1-1 w/o P0

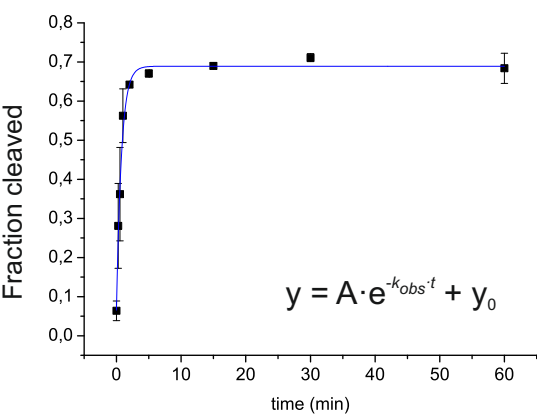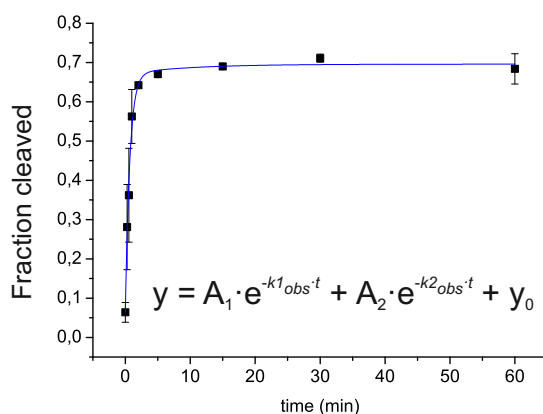

## C Sva-1-1

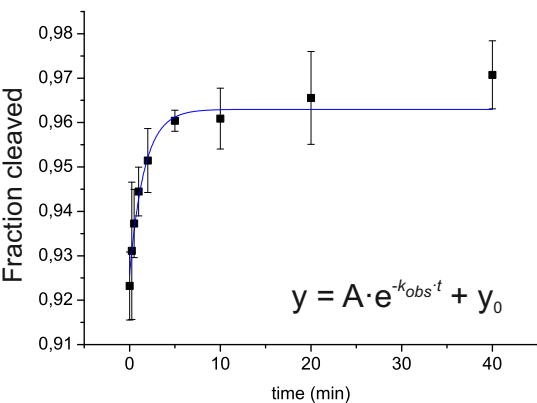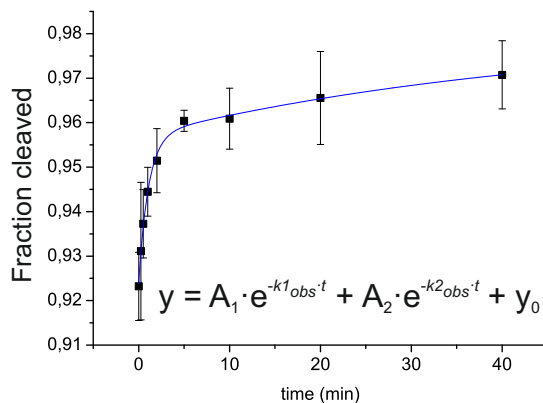

## D Sva-1-1 w/o P0

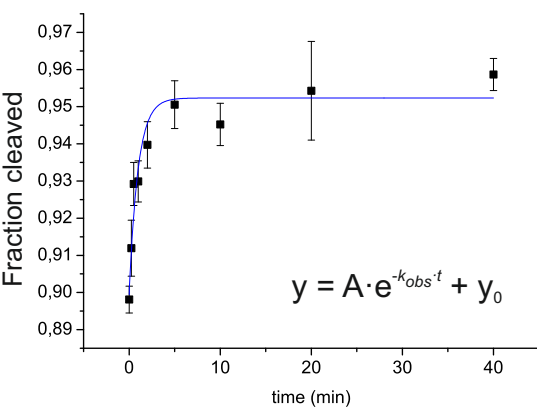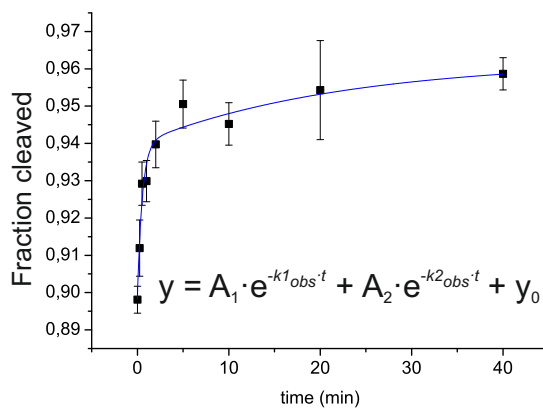

Supplement: Supplementary file 2 [file 1]
